# Supplementary material
Source: publisher figshare collection journal article supplement (https://tandf.figshare.com/articles/dataset/_/7828961)
Supplement: Supplementary file 2 [file 1]

Archive with 3 entries (3 files):
- P160621F.cif
- checkcif.pdf
- supporting imformation.docx
