# Supplementary material
Source: publisher figshare collection journal article supplement (https://tandf.figshare.com/articles/dataset/_/7828961)
Supplement: Supplementary file 2 [file 1 › P160621F.cif]

data_p160621f
_audit_creation_date              2016-06-22
_audit_creation_method
;
Olex2 1.2
(compiled 2015.01.26 svn.r3150 for OlexSys, GUI svn.r4998)
;
_publ_contact_author_address      ?
_publ_contact_author_email        ?
_publ_contact_author_name         ''
_publ_contact_author_phone        ?
_publ_section_references
;
Dolomanov, O.V., Bourhis, L.J., Gildea, R.J, Howard, J.A.K. & Puschmann, H.
 (2009), J. Appl. Cryst. 42, 339-341.

Palatinus, L. & Chapuis, G. (2007). J. Appl. Cryst., 40, 786-790;
Palatinus, L. & van der Lee, A. (2008). J. Appl. Cryst. 41, 975-984;
Palatinus, L., Prathapa, S. J. & van Smaalen, S. (2012). J. Appl. Cryst. 45,
 575-580.

Sheldrick, G.M. (2008). Acta Cryst. A64, 112-122.
;
_chemical_name_common             ?
_chemical_name_systematic
;
 ? 
;
_chemical_formula_moiety          'C43 H37 Eu F18 N4 O14'
_chemical_formula_sum             'C43 H37 Eu F18 N4 O14'
_chemical_formula_weight          1327.73
_chemical_melting_point           ?
_chemical_oxdiff_formula          'C Eu'
_chemical_oxdiff_usercomment      zhang-2
loop_
  _atom_type_symbol
  _atom_type_description
  _atom_type_scat_dispersion_real
  _atom_type_scat_dispersion_imag
  _atom_type_scat_source
 'C' 'C' 0.0033 0.0016 'International Tables Vol C Tables 4.2.6.8 and 6.1.1.4'
 'H' 'H' 0.0000 0.0000 'International Tables Vol C Tables 4.2.6.8 and 6.1.1.4'
 'Eu' 'Eu' -0.1578 3.6682
 'International Tables Vol C Tables 4.2.6.8 and 6.1.1.4'
 'F' 'F' 0.0171 0.0103 'International Tables Vol C Tables 4.2.6.8 and 6.1.1.4'
 'N' 'N' 0.0061 0.0033 'International Tables Vol C Tables 4.2.6.8 and 6.1.1.4'
 'O' 'O' 0.0106 0.0060 'International Tables Vol C Tables 4.2.6.8 and 6.1.1.4'

_space_group_crystal_system       'triclinic'
_space_group_IT_number            2
_space_group_name_H-M_alt         'P -1'
_space_group_name_Hall            '-P 1'
loop_
  _space_group_symop_id
  _space_group_symop_operation_xyz
 1 'x, y, z'
 2 '-x, -y, -z'

_cell_length_a                    11.6961(6)
_cell_length_b                    12.5891(6)
_cell_length_c                    19.3863(12)
_cell_angle_alpha                 90.618(5)
_cell_angle_beta                  104.979(5)
_cell_angle_gamma                 95.282(4)
_cell_volume                      2744.0(3)
_cell_formula_units_Z             2
_cell_measurement_reflns_used     5324
_cell_measurement_temperature     139(6)
_cell_measurement_theta_max       27.5020
_cell_measurement_theta_min       3.3970
_exptl_absorpt_coefficient_mu     1.267
_exptl_absorpt_correction_T_max   1.00000
_exptl_absorpt_correction_T_min   0.69346
_exptl_absorpt_correction_type    multi-scan
_exptl_absorpt_process_details
;
CrysAlisPro 1.171.38.41 (Rigaku Oxford Diffraction, 2015)
Empirical absorption correction using spherical harmonics,
 implemented in SCALE3 ABSPACK scaling algorithm.
;
_exptl_crystal_colour             ?
_exptl_crystal_density_diffrn     1.607
_exptl_crystal_density_meas       ?
_exptl_crystal_density_method     'not measured'
_exptl_crystal_description        'block'
_exptl_crystal_F_000              1320
_exptl_crystal_size_max           ?
_exptl_crystal_size_mid           ?
_exptl_crystal_size_min           ?
_exptl_special_details
;
 ? 
;
_diffrn_reflns_av_R_equivalents   0.0834
_diffrn_reflns_av_unetI/netI      0.0879
_diffrn_reflns_limit_h_max        13
_diffrn_reflns_limit_h_min        -13
_diffrn_reflns_limit_k_max        14
_diffrn_reflns_limit_k_min        -14
_diffrn_reflns_limit_l_max        20
_diffrn_reflns_limit_l_min        -23
_diffrn_reflns_number             18249
_diffrn_reflns_theta_full         25.01
loop_
  _platon_squeeze_void_nr
  _platon_squeeze_void_average_x
  _platon_squeeze_void_average_y
  _platon_squeeze_void_average_z
  _platon_squeeze_void_volume
  _platon_squeeze_void_count_electrons
  _platon_squeeze_void_content
   1  0.000  0.500  0.500       265        33 ' '
_platon_squeeze_details
;
;
_diffrn_reflns_theta_max          25.01
_diffrn_reflns_theta_min          3.45
_diffrn_ambient_environment       N~2~
_diffrn_ambient_temperature       139(6)
_diffrn_detector                  'CCD plate'
_diffrn_detector_area_resol_mean  16.2116
_diffrn_detector_type             Eos
_diffrn_measured_fraction_theta_full 0.974
_diffrn_measured_fraction_theta_max 0.974
_diffrn_measurement_details
;
List of Runs (angles in degrees, time in seconds):

  # Type    Start    End  Width  t~exp~   \w     \q     \k     \f   Frames
--------------------------------------------------------------------------
  1  \w    -45.00  49.00   1.00   18.00    --  -19.25  37.00 -60.00   94
  2  \w     26.00  53.00   1.00   18.00    --   18.94 -99.00  90.00   27
  3  \w     35.00  60.00   1.00   18.00    --   18.94 -99.00-150.00   25
  4  \w     16.00  61.00   1.00   18.00    --   18.94 -99.00 -30.00   45
  5  \w    -62.00 -35.00   1.00   18.00    --  -19.25-178.00 -90.00   27
  6  \w    -88.00   9.00   1.00   18.00    --  -19.25 -77.00  60.00   97
  7  \w    -91.00   7.00   1.00   18.00    --  -19.25 -37.00 120.00   98
;
_diffrn_measurement_device        'four-circle diffractometer'
_diffrn_measurement_device_type   'SuperNova, Single source at offset, Eos'
_diffrn_measurement_method        '\w scans'
_diffrn_orient_matrix_type
'CrysAlisPro convention (1999,Acta A55,543-557)'
_diffrn_orient_matrix_UB_11       0.0249416000
_diffrn_orient_matrix_UB_12       0.0264673000
_diffrn_orient_matrix_UB_13       -0.0256077000
_diffrn_orient_matrix_UB_21       0.0247163000
_diffrn_orient_matrix_UB_22       0.0427330000
_diffrn_orient_matrix_UB_23       0.0251216000
_diffrn_orient_matrix_UB_31       0.0524057000
_diffrn_orient_matrix_UB_32       -0.0260596000
_diffrn_orient_matrix_UB_33       0.0122268000
_diffrn_radiation_monochromator   mirror
_diffrn_radiation_probe           x-ray
_diffrn_radiation_type            MoK\a
_diffrn_radiation_wavelength      0.71073
_diffrn_source                    'micro-focus sealed X-ray tube'
_diffrn_source_type               'SuperNova (Mo) X-ray Source'
_diffrn_standards_decay_%         ?
_diffrn_standards_interval_count  ?
_diffrn_standards_interval_time   ?
_diffrn_standards_number          ?
_reflns_number_gt                 7543
_reflns_number_total              9409
_reflns_odcompleteness_completeness 99.83
_reflns_odcompleteness_iscentric  1
_reflns_odcompleteness_theta      26.32
_reflns_threshold_expression      >2sigma(I)
_computing_cell_refinement        'CrysAlisPro 1.171.38.41 (Rigaku OD, 2015)'
_computing_data_collection        'CrysAlisPro 1.171.38.41 (Rigaku OD, 2015)'
_computing_data_reduction         'CrysAlisPro 1.171.38.41 (Rigaku OD, 2015)'
_computing_molecular_graphics     'Olex2 (Dolomanov et al., 2009)'
_computing_publication_material   'Olex2 (Dolomanov et al., 2009)'
_computing_structure_refinement   'XL (Sheldrick, 2008)'
_computing_structure_solution
;
Superflip (Palatinus & Chapuis, 2007;Palatinus & van der Lee, 2008;
Palatinus et al., 2012)
;
_refine_diff_density_max          1.907
_refine_diff_density_min          -1.517
_refine_diff_density_rms          0.135
_refine_ls_extinction_coef        ?
_refine_ls_extinction_method      none
_refine_ls_goodness_of_fit_ref    1.099
_refine_ls_hydrogen_treatment     constr
_refine_ls_matrix_type            full
_refine_ls_number_parameters      729
_refine_ls_number_reflns          9409
_refine_ls_number_restraints      0
_refine_ls_R_factor_all           0.0915
_refine_ls_R_factor_gt            0.0808
_refine_ls_restrained_S_all       1.099
_refine_ls_shift/su_max           0.001
_refine_ls_shift/su_mean          0.000
_refine_ls_structure_factor_coef  Fsqd
_refine_ls_weighting_details
'calc w=1/[\s^2^(Fo^2^)+(0.1000P)^2^+0.0000P] where P=(Fo^2^+2Fc^2^)/3'
_refine_ls_weighting_scheme       calc
_refine_ls_wR_factor_gt           0.1919
_refine_ls_wR_factor_ref          0.2084
_refine_special_details
;
 Refinement of F^2^ against ALL reflections.  The weighted R-factor wR and 
 goodness of fit S are based on F^2^, conventional R-factors R are based 
 on F, with F set to zero for negative F^2^. The threshold expression of 
 F^2^ > 2sigma(F^2^) is used only for calculating R-factors(gt) etc. and is 
 not relevant to the choice of reflections for refinement.  R-factors based 
 on F^2^ are statistically about twice as large as those based on F, and R- 
 factors based on ALL data will be even larger. 
;
_olex2_refinement_description
;
1. Fixed Uiso
 At 1.2 times of:
  All C(H) groups, All C(H,H) groups
 At 1.5 times of:
  All C(H,H,H) groups
2.a Secondary CH2 refined with riding coordinates:
 C14(H14A,H14B), C28(H28A,H28B)
2.b Aromatic/amide H refined with riding coordinates:
 C25(H25), C9(H9), C24(H24), C36(H36), C12(H12), C11(H11), C41(H41), C23(H23),
 C31(H31)
2.c Idealised Me refined as rotating group:
 C18(H18A,H18B,H18C), C3(H3A,H3B,H3C), C4(H4A,H4B,H4C), C20(H20A,H20B,H20C),
 C6(H6A,H6B,H6C), C1(H1A,H1B,H1C), C15(H15A,H15B,H15C), C17(H17A,H17B,H17C)
;
_atom_sites_solution_hydrogens    geom
_atom_sites_solution_primary      iterative
_atom_sites_solution_secondary    difmap
loop_
  _atom_site_label
  _atom_site_type_symbol
  _atom_site_fract_x
  _atom_site_fract_y
  _atom_site_fract_z
  _atom_site_U_iso_or_equiv
  _atom_site_adp_type
  _atom_site_occupancy
  _atom_site_calc_flag
  _atom_site_disorder_assembly
  _atom_site_disorder_group
  _atom_site_refinement_flags_posn
 Eu1 Eu 0.47341(3) 0.73171(3) 0.219611(19) 0.07176(18) Uani 1 d . . .
 F4 F 0.7903(5) 0.4361(5) 0.1677(3) 0.1087(16) Uani 1 d . . .
 F17 F 0.2964(6) 1.0454(7) 0.0996(6) 0.179(4) Uani 1 d . . .
 F14 F 0.0904(6) 0.6695(6) 0.3018(4) 0.139(2) Uani 1 d . . .
 F12 F 0.5492(5) 1.1032(4) 0.3330(3) 0.1118(16) Uani 1 d . . .
 F2 F 0.5883(5) 0.7578(4) -0.0176(3) 0.0987(13) Uani 1 d . . .
 F9 F 0.5974(6) 0.7358(5) 0.5273(3) 0.1205(18) Uani 1 d . . .
 F1 F 0.4267(4) 0.6555(4) -0.0389(2) 0.0943(13) Uani 1 d . . .
 O2 O 0.0200(5) 0.3860(5) 0.1880(4) 0.0969(16) Uani 1 d . . .
 F7 F 0.6379(5) 0.6090(5) 0.4653(3) 0.1130(16) Uani 1 d . . .
 F11 F 0.3739(6) 1.0567(5) 0.3403(5) 0.157(3) Uani 1 d . . .
 F3 F 0.5907(4) 0.5903(5) -0.0354(3) 0.0975(13) Uani 1 d . . .
 O7 O 0.8642(6) 1.0150(6) 0.5368(3) 0.1042(17) Uani 1 d . . .
 O4 O -0.1279(5) 0.6953(5) 0.0441(3) 0.0926(15) Uani 1 d . . .
 O10 O 0.6287(4) 0.6176(4) 0.2293(3) 0.0770(12) Uani 1 d . . .
 F5 F 0.7220(5) 0.4292(4) 0.2596(3) 0.1030(14) Uani 1 d . . .
 F16 F 0.1204(8) 1.0123(8) 0.0988(6) 0.192(4) Uani 1 d . . .
 F15 F 0.1866(11) 0.7902(12) 0.3624(6) 0.246(8) Uani 1 d . . .
 F6 F 0.8617(5) 0.5485(5) 0.2554(4) 0.1193(18) Uani 1 d . . .
 F10 F 0.5222(9) 1.0676(5) 0.4341(4) 0.160(3) Uani 1 d . . .
 C25 C 0.8394(7) 0.7841(8) 0.4244(5) 0.092(2) Uani 1 d . . .
 H25 H 0.8470 0.7117 0.4308 0.111 Uiso 1 calc . . R
 F18 F 0.1876(13) 0.9337(7) 0.0328(4) 0.225(6) Uani 1 d . . .
 C26 C 0.8556(7) 0.8578(8) 0.4819(5) 0.093(2) Uani 1 d . . .
 F8 F 0.4595(5) 0.6218(5) 0.4686(3) 0.1184(17) Uani 1 d . . .
 O8 O 0.8832(5) 0.8367(6) 0.5527(3) 0.1042(18) Uani 1 d . . .
 N4 N 0.8115(6) 1.0764(5) 0.2577(4) 0.0812(16) Uani 1 d . . .
 O6 O 0.8853(5) 1.1429(5) 0.2997(3) 0.0937(15) Uani 1 d . . .
 C18 C 0.6494(8) 1.1655(7) 0.1885(5) 0.094(2) Uani 1 d . . .
 H18A H 0.5935 1.1211 0.2068 0.141 Uiso 1 calc . . GR
 H18B H 0.6104 1.1889 0.1421 0.141 Uiso 1 calc . . GR
 H18C H 0.6800 1.2264 0.2203 0.141 Uiso 1 calc . . GR
 O9 O 0.4883(4) 0.6973(4) 0.1007(3) 0.0746(11) Uani 1 d . . .
 O11 O 0.5303(4) 0.6960(4) 0.3431(3) 0.0770(12) Uani 1 d . . .
 C19 C 0.7509(7) 1.1024(6) 0.1826(4) 0.0789(18) Uani 1 d . . .
 F13 F 0.0422(11) 0.8183(12) 0.2856(9) 0.280(9) Uani 1 d . . .
 O13 O 0.2897(4) 0.7222(4) 0.2571(3) 0.0815(13) Uani 1 d . . .
 O12 O 0.4861(4) 0.8974(4) 0.2865(3) 0.0773(12) Uani 1 d . . .
 O3 O -0.0352(5) 0.7323(5) -0.0447(3) 0.0960(16) Uani 1 d . . .
 C3 C 0.3753(9) 0.3157(7) 0.2133(5) 0.100(2) Uani 1 d . . .
 H3A H 0.3109 0.2903 0.1732 0.150 Uiso 1 calc . . GR
 H3B H 0.4002 0.2572 0.2430 0.150 Uiso 1 calc . . GR
 H3C H 0.4407 0.3471 0.1966 0.150 Uiso 1 calc . . GR
 O5 O 0.6476(4) 0.8325(4) 0.2110(3) 0.0786(12) Uani 1 d . . .
 C21 C 0.7688(6) 0.9767(6) 0.2749(4) 0.0732(16) Uani 1 d . . .
 O1 O 0.3906(4) 0.5537(4) 0.1941(3) 0.0787(12) Uani 1 d . . .
 O14 O 0.3419(4) 0.8418(4) 0.1442(3) 0.0777(12) Uani 1 d . . .
 C4 C 0.1902(9) 0.4274(10) 0.3357(5) 0.112(3) Uani 1 d . . .
 H4A H 0.2022 0.5028 0.3297 0.169 Uiso 1 calc . . GR
 H4B H 0.2454 0.4083 0.3786 0.169 Uiso 1 calc . . GR
 H4C H 0.1104 0.4088 0.3391 0.169 Uiso 1 calc . . GR
 C20 C 0.8370(8) 1.1642(8) 0.1491(5) 0.101(3) Uani 1 d . . .
 H20A H 0.8556 1.2350 0.1703 0.151 Uiso 1 calc . . GR
 H20B H 0.8021 1.1681 0.0987 0.151 Uiso 1 calc . . GR
 H20C H 0.9085 1.1291 0.1568 0.151 Uiso 1 calc . . GR
 N2 N 0.1310(5) 0.4118(5) 0.2048(4) 0.0777(15) Uani 1 d . . .
 N3 N 0.7006(5) 0.9292(4) 0.2170(3) 0.0718(13) Uani 1 d . . .
 C38 C 0.4847(9) 1.0352(7) 0.3643(5) 0.093(2) Uani 1 d . . .
 N1 N 0.3043(5) 0.4896(5) 0.2082(3) 0.0732(14) Uani 1 d . . .
 C9 C 0.0263(6) 0.5909(6) 0.1155(4) 0.0779(17) Uani 1 d . . .
 H9 H -0.0121 0.5757 0.1512 0.093 Uiso 1 calc . . R
 C6 C 0.1782(9) 0.2493(8) 0.2721(6) 0.111(3) Uani 1 d . . .
 H6A H 0.2346 0.2193 0.3100 0.167 Uiso 1 calc . . GR
 H6B H 0.1792 0.2169 0.2272 0.167 Uiso 1 calc . . GR
 H6C H 0.1000 0.2362 0.2793 0.167 Uiso 1 calc . . GR
 C1 C 0.4329(7) 0.4345(7) 0.3229(5) 0.092(2) Uani 1 d . . .
 H1A H 0.4505 0.3748 0.3528 0.139 Uiso 1 calc . . GR
 H1B H 0.4075 0.4894 0.3486 0.139 Uiso 1 calc . . GR
 H1C H 0.5029 0.4619 0.3091 0.139 Uiso 1 calc . . GR
 C8 C 0.1367(6) 0.5532(6) 0.1170(4) 0.0734(17) Uani 1 d . . .
 C24 C 0.8112(6) 0.8278(7) 0.3571(5) 0.0835(19) Uani 1 d . . .
 H24 H 0.7990 0.7828 0.3170 0.100 Uiso 1 calc . . R
 C22 C 0.8004(6) 0.9363(6) 0.3478(4) 0.0788(19) Uani 1 d . . .
 C5 C 0.2103(7) 0.3669(7) 0.2715(4) 0.0805(19) Uani 1 d . . .
 C2 C 0.3342(7) 0.3990(6) 0.2563(4) 0.0809(19) Uani 1 d . . .
 C14 C -0.1263(8) 0.7563(10) -0.0155(6) 0.109(3) Uani 1 d . . .
 H14A H -0.2019 0.7423 -0.0511 0.130 Uiso 1 calc . . R
 H14B H -0.1158 0.8315 -0.0015 0.130 Uiso 1 calc . . R
 C15 C 0.5884(7) 0.9767(7) 0.0959(4) 0.088(2) Uani 1 d . . .
 H15A H 0.5292 0.9994 0.1175 0.132 Uiso 1 calc . . GR
 H15B H 0.5675 0.9036 0.0792 0.132 Uiso 1 calc . . GR
 H15C H 0.5927 1.0206 0.0563 0.132 Uiso 1 calc . . GR
 C34 C 0.5601(8) 0.6783(7) 0.4653(4) 0.089(2) Uani 1 d . . .
 C16 C 0.7098(7) 0.9869(6) 0.1512(4) 0.0768(17) Uani 1 d . . .
 C43 C 0.2144(8) 0.9698(8) 0.0965(5) 0.097(2) Uani 1 d . . .
 C36 C 0.5240(7) 0.8537(6) 0.4078(4) 0.0810(18) Uani 1 d . . .
 H36 H 0.5316 0.8818 0.4535 0.097 Uiso 1 calc . . R
 C27 C 0.8440(7) 0.9631(7) 0.4723(5) 0.085(2) Uani 1 d . . .
 C12 C 0.1417(9) 0.6359(8) 0.0072(5) 0.099(2) Uani 1 d . . .
 H12 H 0.1782 0.6489 -0.0295 0.118 Uiso 1 calc . . R
 C37 C 0.4996(7) 0.9202(6) 0.3502(4) 0.0778(18) Uani 1 d . . .
 C39 C 0.1305(10) 0.7665(9) 0.2982(7) 0.106(3) Uani 1 d . . .
 C32 C 0.6714(6) 0.5743(6) 0.1851(4) 0.0759(17) Uani 1 d . . .
 C7 C 0.1909(6) 0.4860(6) 0.1757(4) 0.0739(17) Uani 1 d . . .
 C11 C 0.1935(7) 0.5791(7) 0.0649(4) 0.0811(18) Uani 1 d . . .
 H11 H 0.2689 0.5576 0.0689 0.097 Uiso 1 calc . . R
 C10 C -0.0215(6) 0.6513(6) 0.0588(4) 0.0746(16) Uani 1 d . . .
 C33 C 0.7633(7) 0.4949(7) 0.2169(5) 0.0822(19) Uani 1 d . . .
 C13 C 0.0331(7) 0.6733(6) 0.0052(4) 0.0834(19) Uani 1 d . . .
 C17 C 0.8013(8) 0.9340(7) 0.1229(5) 0.089(2) Uani 1 d . . .
 H17A H 0.8118 0.9691 0.0810 0.134 Uiso 1 calc . . GR
 H17B H 0.7741 0.8602 0.1112 0.134 Uiso 1 calc . . GR
 H17C H 0.8757 0.9395 0.1589 0.134 Uiso 1 calc . . GR
 C29 C 0.5407(7) 0.6624(6) -0.0047(4) 0.0802(19) Uani 1 d . . .
 C40 C 0.2103(7) 0.7847(7) 0.2493(5) 0.088(2) Uani 1 d . . .
 C30 C 0.5585(6) 0.6494(5) 0.0760(4) 0.0730(16) Uani 1 d . . .
 C28 C 0.8766(8) 0.9340(8) 0.5888(5) 0.094(2) Uani 1 d . . .
 H28A H 0.9482 0.9513 0.6270 0.113 Uiso 1 calc . . R
 H28B H 0.8088 0.9280 0.6091 0.113 Uiso 1 calc . . R
 C35 C 0.5375(6) 0.7453(6) 0.3988(4) 0.0782(18) Uani 1 d . . .
 C41 C 0.1868(7) 0.8626(7) 0.1993(5) 0.088(2) Uani 1 d . . .
 H41 H 0.1233 0.9025 0.1983 0.105 Uiso 1 calc . . R
 C42 C 0.2527(7) 0.8837(6) 0.1514(4) 0.0804(18) Uani 1 d . . .
 C23 C 0.8165(7) 1.0068(7) 0.4056(4) 0.0836(19) Uani 1 d . . .
 H23 H 0.8093 1.0793 0.3999 0.100 Uiso 1 calc . . R
 C31 C 0.6460(6) 0.5891(7) 0.1118(4) 0.0818(19) Uani 1 d . . .
 H31 H 0.6904 0.5565 0.0858 0.098 Uiso 1 calc . . R

loop_
  _atom_site_aniso_label
  _atom_site_aniso_U_11
  _atom_site_aniso_U_22
  _atom_site_aniso_U_33
  _atom_site_aniso_U_23
  _atom_site_aniso_U_13
  _atom_site_aniso_U_12
 Eu1 0.0828(3) 0.0569(2) 0.0790(3) 0.01666(17) 0.02539(17) 0.00994(16)
 F4 0.112(3) 0.102(4) 0.124(4) 0.015(3) 0.038(3) 0.047(3)
 F17 0.136(5) 0.118(5) 0.271(11) 0.117(6) 0.027(5) 0.016(4)
 F14 0.153(5) 0.110(5) 0.178(6) 0.021(4) 0.094(5) -0.006(4)
 F12 0.160(5) 0.067(3) 0.118(4) 0.017(3) 0.052(3) 0.012(3)
 F2 0.130(4) 0.079(3) 0.091(3) 0.016(2) 0.039(3) -0.003(3)
 F9 0.184(5) 0.096(4) 0.078(3) 0.019(3) 0.024(3) 0.022(4)
 F1 0.102(3) 0.099(3) 0.082(3) 0.008(2) 0.022(2) 0.015(2)
 O2 0.083(3) 0.080(4) 0.127(5) 0.028(3) 0.027(3) 0.002(3)
 F7 0.142(4) 0.100(4) 0.105(4) 0.038(3) 0.031(3) 0.047(3)
 F11 0.118(4) 0.088(4) 0.276(10) -0.006(5) 0.064(5) 0.033(3)
 F3 0.113(3) 0.096(4) 0.090(3) 0.001(3) 0.036(2) 0.012(3)
 O7 0.127(5) 0.098(4) 0.084(4) 0.016(3) 0.022(3) 0.007(4)
 O4 0.090(3) 0.101(4) 0.096(4) 0.037(3) 0.034(3) 0.027(3)
 O10 0.087(3) 0.062(3) 0.084(3) 0.019(2) 0.025(2) 0.007(2)
 F5 0.128(4) 0.071(3) 0.125(4) 0.038(3) 0.049(3) 0.034(2)
 F16 0.170(6) 0.210(9) 0.247(10) 0.148(8) 0.104(6) 0.124(7)
 F15 0.259(11) 0.320(17) 0.192(9) -0.103(11) 0.169(9) -0.111(11)
 F6 0.096(3) 0.098(4) 0.150(5) 0.012(4) 0.003(3) 0.021(3)
 F10 0.313(10) 0.078(4) 0.104(4) 0.013(3) 0.076(5) 0.037(5)
 C25 0.093(5) 0.085(5) 0.101(6) 0.039(5) 0.024(4) 0.017(4)
 F18 0.423(16) 0.119(6) 0.103(5) 0.039(4) 0.002(7) 0.065(8)
 C26 0.085(5) 0.101(6) 0.093(5) 0.032(5) 0.020(4) 0.010(4)
 F8 0.136(4) 0.119(5) 0.108(4) 0.048(3) 0.046(3) 0.009(3)
 O8 0.114(4) 0.109(5) 0.088(4) 0.038(3) 0.019(3) 0.018(3)
 N4 0.093(4) 0.065(4) 0.081(4) 0.016(3) 0.016(3) 0.003(3)
 O6 0.110(4) 0.073(3) 0.087(3) 0.018(3) 0.010(3) -0.009(3)
 C18 0.116(6) 0.060(4) 0.105(6) 0.016(4) 0.025(5) 0.018(4)
 O9 0.080(3) 0.065(3) 0.083(3) 0.014(2) 0.027(2) 0.007(2)
 O11 0.091(3) 0.061(3) 0.081(3) 0.013(2) 0.023(2) 0.016(2)
 C19 0.089(4) 0.065(4) 0.079(4) 0.018(3) 0.016(3) 0.002(3)
 F13 0.258(11) 0.309(14) 0.413(19) 0.261(14) 0.267(13) 0.205(11)
 O13 0.089(3) 0.069(3) 0.092(3) 0.020(3) 0.030(2) 0.017(2)
 O12 0.093(3) 0.062(3) 0.080(3) 0.014(2) 0.025(2) 0.012(2)
 O3 0.114(4) 0.092(4) 0.091(4) 0.041(3) 0.034(3) 0.036(3)
 C3 0.121(6) 0.070(5) 0.116(7) 0.027(5) 0.039(5) 0.020(4)
 O5 0.092(3) 0.056(3) 0.087(3) 0.009(2) 0.026(2) -0.002(2)
 C21 0.075(4) 0.063(4) 0.086(4) 0.018(3) 0.026(3) 0.012(3)
 O1 0.082(3) 0.066(3) 0.092(3) 0.022(2) 0.030(2) 0.006(2)
 O14 0.087(3) 0.067(3) 0.082(3) 0.017(2) 0.023(2) 0.015(2)
 C4 0.112(6) 0.134(9) 0.098(6) 0.048(6) 0.034(5) 0.022(6)
 C20 0.123(7) 0.077(5) 0.096(6) 0.024(4) 0.023(5) -0.009(5)
 N2 0.077(4) 0.067(4) 0.089(4) 0.023(3) 0.020(3) 0.006(3)
 N3 0.083(3) 0.052(3) 0.082(4) 0.012(3) 0.025(3) 0.008(2)
 C38 0.125(7) 0.073(5) 0.093(5) 0.017(4) 0.047(5) 0.017(4)
 N1 0.082(3) 0.058(3) 0.081(3) 0.014(3) 0.023(3) 0.006(2)
 C9 0.086(4) 0.072(4) 0.076(4) 0.015(3) 0.023(3) 0.000(3)
 C6 0.107(6) 0.074(5) 0.150(9) 0.050(6) 0.029(6) 0.002(4)
 C1 0.093(5) 0.083(5) 0.096(5) 0.027(4) 0.016(4) 0.001(4)
 C8 0.076(4) 0.057(4) 0.085(4) 0.018(3) 0.015(3) 0.008(3)
 C24 0.080(4) 0.078(5) 0.096(5) 0.018(4) 0.026(4) 0.015(3)
 C22 0.075(4) 0.070(4) 0.091(5) 0.032(4) 0.020(3) 0.007(3)
 C5 0.085(4) 0.070(4) 0.090(5) 0.024(4) 0.025(3) 0.015(3)
 C2 0.094(5) 0.060(4) 0.096(5) 0.026(4) 0.033(4) 0.014(3)
 C14 0.098(6) 0.122(8) 0.114(7) 0.045(6) 0.035(5) 0.026(5)
 C15 0.101(5) 0.070(5) 0.083(5) 0.018(4) 0.007(4) 0.003(4)
 C34 0.116(6) 0.073(5) 0.077(5) 0.016(4) 0.022(4) 0.013(4)
 C16 0.097(5) 0.056(4) 0.081(4) 0.017(3) 0.030(3) 0.005(3)
 C43 0.102(6) 0.087(6) 0.104(6) 0.032(5) 0.025(4) 0.024(5)
 C36 0.103(5) 0.066(4) 0.081(4) 0.012(4) 0.034(4) 0.015(4)
 C27 0.091(5) 0.080(5) 0.085(5) 0.016(4) 0.023(4) 0.004(4)
 C12 0.123(7) 0.089(6) 0.097(6) 0.022(5) 0.045(5) 0.029(5)
 C37 0.091(5) 0.065(4) 0.083(5) 0.007(3) 0.033(3) 0.013(3)
 C39 0.119(7) 0.098(7) 0.126(8) 0.016(6) 0.071(6) 0.020(6)
 C32 0.084(4) 0.057(4) 0.088(5) 0.015(3) 0.024(3) 0.005(3)
 C7 0.081(4) 0.061(4) 0.083(4) 0.007(3) 0.028(3) 0.005(3)
 C11 0.092(5) 0.074(5) 0.085(5) 0.017(4) 0.034(4) 0.017(4)
 C10 0.086(4) 0.062(4) 0.081(4) 0.014(3) 0.027(3) 0.014(3)
 C33 0.082(4) 0.069(4) 0.098(5) 0.019(4) 0.025(4) 0.014(3)
 C13 0.098(5) 0.066(4) 0.086(5) 0.017(4) 0.020(4) 0.017(4)
 C17 0.112(6) 0.075(5) 0.089(5) 0.014(4) 0.040(4) 0.015(4)
 C29 0.094(5) 0.066(4) 0.085(5) 0.005(4) 0.028(4) 0.012(3)
 C40 0.098(5) 0.072(5) 0.096(5) 0.004(4) 0.028(4) 0.003(4)
 C30 0.083(4) 0.052(3) 0.088(4) 0.001(3) 0.030(3) 0.005(3)
 C28 0.099(5) 0.099(6) 0.088(5) 0.031(5) 0.027(4) 0.017(4)
 C35 0.078(4) 0.069(4) 0.087(5) 0.017(4) 0.018(3) 0.006(3)
 C41 0.082(4) 0.073(5) 0.115(6) 0.029(4) 0.033(4) 0.023(3)
 C42 0.082(4) 0.065(4) 0.091(5) 0.015(4) 0.015(3) 0.010(3)
 C23 0.090(5) 0.079(5) 0.081(5) 0.016(4) 0.021(3) 0.005(4)
 C31 0.085(4) 0.074(5) 0.093(5) 0.002(4) 0.033(4) 0.013(3)

_geom_special_details
;
 All esds (except the esd in the dihedral angle between two l.s. planes) 
 are estimated using the full covariance matrix.  The cell esds are taken 
 into account individually in the estimation of esds in distances, angles 
 and torsion angles; correlations between esds in cell parameters are only 
 used when they are defined by crystal symmetry.  An approximate (isotropic) 
 treatment of cell esds is used for estimating esds involving l.s. planes. 
;
loop_
  _geom_bond_atom_site_label_1
  _geom_bond_atom_site_label_2
  _geom_bond_distance
  _geom_bond_site_symmetry_2
  _geom_bond_publ_flag
 Eu1 O10 2.389(5) . ?
 Eu1 O9 2.394(5) . ?
 Eu1 O11 2.372(5) . ?
 Eu1 O13 2.434(5) . ?
 Eu1 O12 2.416(5) . ?
 Eu1 O5 2.344(5) . ?
 Eu1 O1 2.352(5) . ?
 Eu1 O14 2.387(5) . ?
 F4 C33 1.320(10) . ?
 F17 C43 1.276(12) . ?
 F14 C39 1.276(12) . ?
 F12 C38 1.341(10) . ?
 F2 C29 1.331(9) . ?
 F9 C34 1.344(10) . ?
 F1 C29 1.321(9) . ?
 O2 N2 1.264(8) . ?
 F7 C34 1.318(10) . ?
 F11 C38 1.314(11) . ?
 F3 C29 1.337(9) . ?
 O7 C27 1.359(10) . ?
 O7 C28 1.432(11) . ?
 O4 C14 1.396(11) . ?
 O4 C10 1.372(9) . ?
 O10 C32 1.243(9) . ?
 F5 C33 1.324(10) . ?
 F16 C43 1.277(11) . ?
 F15 C39 1.266(15) . ?
 F6 C33 1.319(9) . ?
 F10 C38 1.355(11) . ?
 C25 H25 0.9300 . ?
 C25 C26 1.406(13) . ?
 C25 C24 1.392(12) . ?
 F18 C43 1.262(12) . ?
 C26 O8 1.360(10) . ?
 C26 C27 1.356(13) . ?
 F8 C34 1.334(10) . ?
 O8 C28 1.423(12) . ?
 N4 O6 1.264(8) . ?
 N4 C19 1.500(10) . ?
 N4 C21 1.385(10) . ?
 C18 H18A 0.9600 . ?
 C18 H18B 0.9600 . ?
 C18 H18C 0.9600 . ?
 C18 C19 1.514(11) . ?
 O9 C30 1.248(8) . ?
 O11 C35 1.221(9) . ?
 C19 C20 1.500(11) . ?
 C19 C16 1.555(11) . ?
 F13 C39 1.245(12) . ?
 O13 C40 1.252(10) . ?
 O12 C37 1.231(9) . ?
 O3 C14 1.384(11) . ?
 O3 C13 1.361(9) . ?
 C3 H3A 0.9600 . ?
 C3 H3B 0.9600 . ?
 C3 H3C 0.9600 . ?
 C3 C2 1.517(12) . ?
 O5 N3 1.304(7) . ?
 C21 N3 1.300(9) . ?
 C21 C22 1.472(10) . ?
 O1 N1 1.321(7) . ?
 O14 C42 1.249(9) . ?
 C4 H4A 0.9600 . ?
 C4 H4B 0.9600 . ?
 C4 H4C 0.9600 . ?
 C4 C5 1.533(14) . ?
 C20 H20A 0.9600 . ?
 C20 H20B 0.9600 . ?
 C20 H20C 0.9600 . ?
 N2 C5 1.530(10) . ?
 N2 C7 1.334(10) . ?
 N3 C16 1.498(9) . ?
 C38 C37 1.505(12) . ?
 N1 C2 1.490(9) . ?
 N1 C7 1.308(9) . ?
 C9 H9 0.9300 . ?
 C9 C8 1.410(11) . ?
 C9 C10 1.371(11) . ?
 C6 H6A 0.9600 . ?
 C6 H6B 0.9600 . ?
 C6 H6C 0.9600 . ?
 C6 C5 1.495(12) . ?
 C1 H1A 0.9600 . ?
 C1 H1B 0.9600 . ?
 C1 H1C 0.9600 . ?
 C1 C2 1.524(11) . ?
 C8 C7 1.470(11) . ?
 C8 C11 1.372(11) . ?
 C24 H24 0.9300 . ?
 C24 C22 1.394(11) . ?
 C22 C23 1.385(12) . ?
 C5 C2 1.570(11) . ?
 C14 H14A 0.9700 . ?
 C14 H14B 0.9700 . ?
 C15 H15A 0.9600 . ?
 C15 H15B 0.9600 . ?
 C15 H15C 0.9600 . ?
 C15 C16 1.536(10) . ?
 C34 C35 1.526(11) . ?
 C16 C17 1.521(11) . ?
 C43 C42 1.541(11) . ?
 C36 H36 0.9300 . ?
 C36 C37 1.389(11) . ?
 C36 C35 1.403(11) . ?
 C27 C23 1.382(12) . ?
 C12 H12 0.9300 . ?
 C12 C11 1.370(12) . ?
 C12 C13 1.386(12) . ?
 C39 C40 1.498(13) . ?
 C32 C33 1.551(11) . ?
 C32 C31 1.391(11) . ?
 C11 H11 0.9300 . ?
 C10 C13 1.370(11) . ?
 C17 H17A 0.9600 . ?
 C17 H17B 0.9600 . ?
 C17 H17C 0.9600 . ?
 C29 C30 1.536(11) . ?
 C40 C41 1.382(12) . ?
 C30 C31 1.376(11) . ?
 C28 H28A 0.9700 . ?
 C28 H28B 0.9700 . ?
 C41 H41 0.9300 . ?
 C41 C42 1.366(12) . ?
 C23 H23 0.9300 . ?
 C31 H31 0.9300 . ?

loop_
  _geom_angle_atom_site_label_1
  _geom_angle_atom_site_label_2
  _geom_angle_atom_site_label_3
  _geom_angle
  _geom_angle_site_symmetry_1
  _geom_angle_site_symmetry_3
  _geom_angle_publ_flag
 O10 Eu1 O9 73.33(17) . . ?
 O10 Eu1 O13 134.64(18) . . ?
 O10 Eu1 O12 126.22(17) . . ?
 O9 Eu1 O13 125.66(17) . . ?
 O9 Eu1 O12 131.15(17) . . ?
 O11 Eu1 O10 76.23(17) . . ?
 O11 Eu1 O9 149.30(17) . . ?
 O11 Eu1 O13 75.02(18) . . ?
 O11 Eu1 O12 71.88(17) . . ?
 O11 Eu1 O14 136.89(17) . . ?
 O12 Eu1 O13 75.55(18) . . ?
 O5 Eu1 O10 70.40(17) . . ?
 O5 Eu1 O9 74.43(17) . . ?
 O5 Eu1 O11 99.04(18) . . ?
 O5 Eu1 O13 148.50(18) . . ?
 O5 Eu1 O12 73.25(17) . . ?
 O5 Eu1 O1 136.18(17) . . ?
 O5 Eu1 O14 94.97(18) . . ?
 O1 Eu1 O10 70.35(16) . . ?
 O1 Eu1 O9 76.37(17) . . ?
 O1 Eu1 O11 89.87(18) . . ?
 O1 Eu1 O13 75.25(17) . . ?
 O1 Eu1 O12 148.70(18) . . ?
 O1 Eu1 O14 107.36(18) . . ?
 O14 Eu1 O10 146.57(18) . . ?
 O14 Eu1 O9 73.80(17) . . ?
 O14 Eu1 O13 71.96(18) . . ?
 O14 Eu1 O12 73.62(17) . . ?
 C27 O7 C28 106.1(7) . . ?
 C10 O4 C14 103.9(6) . . ?
 C32 O10 Eu1 133.8(5) . . ?
 C26 C25 H25 122.6 . . ?
 C24 C25 H25 122.6 . . ?
 C24 C25 C26 114.8(8) . . ?
 O8 C26 C25 127.0(9) . . ?
 C27 C26 C25 122.3(8) . . ?
 C27 C26 O8 110.7(9) . . ?
 C26 O8 C28 105.7(7) . . ?
 O6 N4 C19 122.2(6) . . ?
 O6 N4 C21 126.2(7) . . ?
 C21 N4 C19 111.4(6) . . ?
 H18A C18 H18B 109.5 . . ?
 H18A C18 H18C 109.5 . . ?
 H18B C18 H18C 109.5 . . ?
 C19 C18 H18A 109.5 . . ?
 C19 C18 H18B 109.5 . . ?
 C19 C18 H18C 109.5 . . ?
 C30 O9 Eu1 133.2(5) . . ?
 C35 O11 Eu1 136.0(5) . . ?
 N4 C19 C18 105.6(7) . . ?
 N4 C19 C20 110.3(6) . . ?
 N4 C19 C16 98.8(6) . . ?
 C18 C19 C16 113.6(6) . . ?
 C20 C19 C18 112.4(7) . . ?
 C20 C19 C16 114.8(7) . . ?
 C40 O13 Eu1 131.5(6) . . ?
 C37 O12 Eu1 133.8(5) . . ?
 C13 O3 C14 104.5(7) . . ?
 H3A C3 H3B 109.5 . . ?
 H3A C3 H3C 109.5 . . ?
 H3B C3 H3C 109.5 . . ?
 C2 C3 H3A 109.5 . . ?
 C2 C3 H3B 109.5 . . ?
 C2 C3 H3C 109.5 . . ?
 N3 O5 Eu1 143.4(4) . . ?
 N4 C21 C22 123.1(7) . . ?
 N3 C21 N4 108.3(7) . . ?
 N3 C21 C22 128.5(7) . . ?
 N1 O1 Eu1 138.1(4) . . ?
 C42 O14 Eu1 132.3(5) . . ?
 H4A C4 H4B 109.5 . . ?
 H4A C4 H4C 109.5 . . ?
 H4B C4 H4C 109.5 . . ?
 C5 C4 H4A 109.5 . . ?
 C5 C4 H4B 109.5 . . ?
 C5 C4 H4C 109.5 . . ?
 C19 C20 H20A 109.5 . . ?
 C19 C20 H20B 109.5 . . ?
 C19 C20 H20C 109.5 . . ?
 H20A C20 H20B 109.5 . . ?
 H20A C20 H20C 109.5 . . ?
 H20B C20 H20C 109.5 . . ?
 O2 N2 C5 120.1(6) . . ?
 O2 N2 C7 127.5(7) . . ?
 C7 N2 C5 112.0(6) . . ?
 O5 N3 C16 119.6(6) . . ?
 C21 N3 O5 126.6(6) . . ?
 C21 N3 C16 112.4(6) . . ?
 F12 C38 F10 103.0(8) . . ?
 F12 C38 C37 112.8(7) . . ?
 F11 C38 F12 106.0(8) . . ?
 F11 C38 F10 107.9(8) . . ?
 F11 C38 C37 112.2(8) . . ?
 F10 C38 C37 114.3(8) . . ?
 O1 N1 C2 119.6(6) . . ?
 C7 N1 O1 126.3(6) . . ?
 C7 N1 C2 113.2(6) . . ?
 C8 C9 H9 121.7 . . ?
 C10 C9 H9 121.7 . . ?
 C10 C9 C8 116.5(7) . . ?
 H6A C6 H6B 109.5 . . ?
 H6A C6 H6C 109.5 . . ?
 H6B C6 H6C 109.5 . . ?
 C5 C6 H6A 109.5 . . ?
 C5 C6 H6B 109.5 . . ?
 C5 C6 H6C 109.5 . . ?
 H1A C1 H1B 109.5 . . ?
 H1A C1 H1C 109.5 . . ?
 H1B C1 H1C 109.5 . . ?
 C2 C1 H1A 109.5 . . ?
 C2 C1 H1B 109.5 . . ?
 C2 C1 H1C 109.5 . . ?
 C9 C8 C7 118.9(7) . . ?
 C11 C8 C9 120.9(7) . . ?
 C11 C8 C7 120.2(7) . . ?
 C25 C24 H24 118.8 . . ?
 C25 C24 C22 122.5(8) . . ?
 C22 C24 H24 118.8 . . ?
 C24 C22 C21 119.4(8) . . ?
 C23 C22 C21 119.3(7) . . ?
 C23 C22 C24 121.3(7) . . ?
 C4 C5 C2 114.1(7) . . ?
 N2 C5 C4 106.3(7) . . ?
 N2 C5 C2 98.5(6) . . ?
 C6 C5 C4 112.8(8) . . ?
 C6 C5 N2 109.2(7) . . ?
 C6 C5 C2 114.5(7) . . ?
 C3 C2 C1 110.0(7) . . ?
 C3 C2 C5 114.5(7) . . ?
 N1 C2 C3 106.2(7) . . ?
 N1 C2 C1 111.2(6) . . ?
 N1 C2 C5 100.3(6) . . ?
 C1 C2 C5 113.9(7) . . ?
 O4 C14 H14A 109.5 . . ?
 O4 C14 H14B 109.5 . . ?
 O3 C14 O4 110.8(7) . . ?
 O3 C14 H14A 109.5 . . ?
 O3 C14 H14B 109.5 . . ?
 H14A C14 H14B 108.1 . . ?
 H15A C15 H15B 109.5 . . ?
 H15A C15 H15C 109.5 . . ?
 H15B C15 H15C 109.5 . . ?
 C16 C15 H15A 109.5 . . ?
 C16 C15 H15B 109.5 . . ?
 C16 C15 H15C 109.5 . . ?
 F9 C34 C35 114.3(7) . . ?
 F7 C34 F9 107.5(7) . . ?
 F7 C34 F8 106.5(8) . . ?
 F7 C34 C35 112.6(7) . . ?
 F8 C34 F9 105.5(7) . . ?
 F8 C34 C35 110.0(7) . . ?
 N3 C16 C19 100.9(6) . . ?
 N3 C16 C15 110.0(6) . . ?
 N3 C16 C17 106.0(6) . . ?
 C15 C16 C19 113.5(6) . . ?
 C17 C16 C19 114.7(6) . . ?
 C17 C16 C15 110.9(7) . . ?
 F17 C43 F16 107.4(10) . . ?
 F17 C43 C42 112.8(8) . . ?
 F16 C43 C42 116.1(8) . . ?
 F18 C43 F17 105.0(11) . . ?
 F18 C43 F16 101.6(10) . . ?
 F18 C43 C42 112.9(9) . . ?
 C37 C36 H36 119.2 . . ?
 C37 C36 C35 121.7(7) . . ?
 C35 C36 H36 119.2 . . ?
 O7 C27 C23 127.4(8) . . ?
 C26 C27 O7 109.6(8) . . ?
 C26 C27 C23 123.0(8) . . ?
 C11 C12 H12 121.0 . . ?
 C11 C12 C13 118.1(8) . . ?
 C13 C12 H12 121.0 . . ?
 O12 C37 C38 113.4(7) . . ?
 O12 C37 C36 128.3(7) . . ?
 C36 C37 C38 118.3(7) . . ?
 F14 C39 C40 115.2(9) . . ?
 F15 C39 F14 102.3(12) . . ?
 F15 C39 C40 111.0(9) . . ?
 F13 C39 F14 105.7(11) . . ?
 F13 C39 F15 105.8(12) . . ?
 F13 C39 C40 115.6(10) . . ?
 O10 C32 C33 114.7(7) . . ?
 O10 C32 C31 127.6(7) . . ?
 C31 C32 C33 117.7(7) . . ?
 N2 C7 C8 124.8(7) . . ?
 N1 C7 N2 109.1(7) . . ?
 N1 C7 C8 126.1(7) . . ?
 C8 C11 H11 119.3 . . ?
 C12 C11 C8 121.4(8) . . ?
 C12 C11 H11 119.3 . . ?
 C9 C10 O4 128.1(7) . . ?
 C13 C10 O4 109.5(7) . . ?
 C13 C10 C9 122.4(7) . . ?
 F4 C33 F5 107.6(7) . . ?
 F4 C33 C32 113.0(7) . . ?
 F5 C33 C32 110.5(6) . . ?
 F6 C33 F4 108.5(6) . . ?
 F6 C33 F5 107.7(7) . . ?
 F6 C33 C32 109.3(7) . . ?
 O3 C13 C12 129.6(8) . . ?
 O3 C13 C10 109.8(7) . . ?
 C10 C13 C12 120.5(8) . . ?
 C16 C17 H17A 109.5 . . ?
 C16 C17 H17B 109.5 . . ?
 C16 C17 H17C 109.5 . . ?
 H17A C17 H17B 109.5 . . ?
 H17A C17 H17C 109.5 . . ?
 H17B C17 H17C 109.5 . . ?
 F2 C29 F3 106.5(6) . . ?
 F2 C29 C30 110.6(6) . . ?
 F1 C29 F2 106.9(7) . . ?
 F1 C29 F3 107.3(6) . . ?
 F1 C29 C30 111.5(6) . . ?
 F3 C29 C30 113.6(7) . . ?
 O13 C40 C39 114.3(9) . . ?
 O13 C40 C41 127.2(8) . . ?
 C41 C40 C39 118.5(8) . . ?
 O9 C30 C29 113.1(7) . . ?
 O9 C30 C31 128.1(7) . . ?
 C31 C30 C29 118.8(6) . . ?
 O7 C28 H28A 110.4 . . ?
 O7 C28 H28B 110.4 . . ?
 O8 C28 O7 106.9(7) . . ?
 O8 C28 H28A 110.4 . . ?
 O8 C28 H28B 110.4 . . ?
 H28A C28 H28B 108.6 . . ?
 O11 C35 C34 114.9(7) . . ?
 O11 C35 C36 127.5(8) . . ?
 C36 C35 C34 117.5(7) . . ?
 C40 C41 H41 118.6 . . ?
 C42 C41 C40 122.9(7) . . ?
 C42 C41 H41 118.6 . . ?
 O14 C42 C43 112.9(7) . . ?
 O14 C42 C41 129.2(8) . . ?
 C41 C42 C43 117.8(7) . . ?
 C22 C23 H23 121.9 . . ?
 C27 C23 C22 116.2(8) . . ?
 C27 C23 H23 121.9 . . ?
 C32 C31 H31 118.3 . . ?
 C30 C31 C32 123.4(7) . . ?
 C30 C31 H31 118.3 . . ?

loop_
  _geom_torsion_atom_site_label_1
  _geom_torsion_atom_site_label_2
  _geom_torsion_atom_site_label_3
  _geom_torsion_atom_site_label_4
  _geom_torsion
  _geom_torsion_site_symmetry_1
  _geom_torsion_site_symmetry_2
  _geom_torsion_site_symmetry_3
  _geom_torsion_site_symmetry_4
  _geom_torsion_publ_flag
 Eu1 O10 C32 C33 -173.0(4) . . . . ?
 Eu1 O10 C32 C31 7.0(12) . . . . ?
 Eu1 O9 C30 C29 -172.1(4) . . . . ?
 Eu1 O9 C30 C31 7.8(11) . . . . ?
 Eu1 O11 C35 C34 170.1(5) . . . . ?
 Eu1 O11 C35 C36 -7.9(12) . . . . ?
 Eu1 O13 C40 C39 -162.7(6) . . . . ?
 Eu1 O13 C40 C41 20.4(13) . . . . ?
 Eu1 O12 C37 C38 -172.0(5) . . . . ?
 Eu1 O12 C37 C36 6.8(12) . . . . ?
 Eu1 O5 N3 C21 88.3(9) . . . . ?
 Eu1 O5 N3 C16 -106.2(8) . . . . ?
 Eu1 O1 N1 C2 -111.0(7) . . . . ?
 Eu1 O1 N1 C7 80.1(9) . . . . ?
 Eu1 O14 C42 C43 166.2(6) . . . . ?
 Eu1 O14 C42 C41 -14.7(13) . . . . ?
 F17 C43 C42 O14 -58.6(12) . . . . ?
 F17 C43 C42 C41 122.1(10) . . . . ?
 F14 C39 C40 O13 -47.6(14) . . . . ?
 F14 C39 C40 C41 129.6(11) . . . . ?
 F12 C38 C37 O12 -50.2(11) . . . . ?
 F12 C38 C37 C36 130.9(8) . . . . ?
 F2 C29 C30 O9 77.4(8) . . . . ?
 F2 C29 C30 C31 -102.5(8) . . . . ?
 F9 C34 C35 O11 164.0(7) . . . . ?
 F9 C34 C35 C36 -17.8(11) . . . . ?
 F1 C29 C30 O9 -41.4(9) . . . . ?
 F1 C29 C30 C31 138.7(7) . . . . ?
 O2 N2 C5 C4 -75.2(9) . . . . ?
 O2 N2 C5 C6 46.8(10) . . . . ?
 O2 N2 C5 C2 166.6(7) . . . . ?
 O2 N2 C7 N1 179.6(7) . . . . ?
 O2 N2 C7 C8 0.1(13) . . . . ?
 F7 C34 C35 O11 41.0(10) . . . . ?
 F7 C34 C35 C36 -140.8(8) . . . . ?
 F11 C38 C37 O12 69.5(10) . . . . ?
 F11 C38 C37 C36 -109.5(9) . . . . ?
 F3 C29 C30 O9 -162.8(6) . . . . ?
 F3 C29 C30 C31 17.3(10) . . . . ?
 O7 C27 C23 C22 179.8(7) . . . . ?
 O4 C10 C13 O3 0.6(9) . . . . ?
 O4 C10 C13 C12 -179.0(8) . . . . ?
 O10 Eu1 O9 C30 -5.4(6) . . . . ?
 O10 Eu1 O11 C35 145.6(7) . . . . ?
 O10 Eu1 O13 C40 -178.6(6) . . . . ?
 O10 Eu1 O12 C37 -65.4(7) . . . . ?
 O10 Eu1 O5 N3 -160.1(8) . . . . ?
 O10 Eu1 O1 N1 138.5(7) . . . . ?
 O10 Eu1 O14 C42 168.0(6) . . . . ?
 O10 C32 C33 F4 168.3(6) . . . . ?
 O10 C32 C33 F5 47.6(9) . . . . ?
 O10 C32 C33 F6 -70.7(9) . . . . ?
 O10 C32 C31 C30 -6.2(13) . . . . ?
 F16 C43 C42 O14 176.9(10) . . . . ?
 F16 C43 C42 C41 -2.4(14) . . . . ?
 F15 C39 C40 O13 68.0(13) . . . . ?
 F15 C39 C40 C41 -114.8(13) . . . . ?
 F10 C38 C37 O12 -167.4(8) . . . . ?
 F10 C38 C37 C36 13.7(12) . . . . ?
 C25 C26 O8 C28 -173.6(8) . . . . ?
 C25 C26 C27 O7 179.9(7) . . . . ?
 C25 C26 C27 C23 -0.5(13) . . . . ?
 C25 C24 C22 C21 -179.2(7) . . . . ?
 C25 C24 C22 C23 -0.6(12) . . . . ?
 F18 C43 C42 O14 60.2(12) . . . . ?
 F18 C43 C42 C41 -119.0(11) . . . . ?
 C26 C25 C24 C22 0.4(11) . . . . ?
 C26 O8 C28 O7 -9.7(9) . . . . ?
 C26 C27 C23 C22 0.3(12) . . . . ?
 F8 C34 C35 O11 -77.6(9) . . . . ?
 F8 C34 C35 C36 100.6(8) . . . . ?
 O8 C26 C27 O7 0.2(10) . . . . ?
 O8 C26 C27 C23 179.7(7) . . . . ?
 N4 C19 C16 N3 26.5(7) . . . . ?
 N4 C19 C16 C15 144.1(6) . . . . ?
 N4 C19 C16 C17 -87.0(8) . . . . ?
 N4 C21 N3 O5 177.2(6) . . . . ?
 N4 C21 N3 C16 10.9(8) . . . . ?
 N4 C21 C22 C24 -146.0(7) . . . . ?
 N4 C21 C22 C23 35.3(10) . . . . ?
 O6 N4 C19 C18 -80.7(9) . . . . ?
 O6 N4 C19 C20 41.0(10) . . . . ?
 O6 N4 C19 C16 161.6(7) . . . . ?
 O6 N4 C21 N3 -176.0(7) . . . . ?
 O6 N4 C21 C22 3.3(12) . . . . ?
 C18 C19 C16 N3 -84.9(7) . . . . ?
 C18 C19 C16 C15 32.7(9) . . . . ?
 C18 C19 C16 C17 161.6(7) . . . . ?
 O9 Eu1 O10 C32 -1.7(6) . . . . ?
 O9 Eu1 O11 C35 153.1(6) . . . . ?
 O9 Eu1 O13 C40 -76.3(7) . . . . ?
 O9 Eu1 O12 C37 -165.1(6) . . . . ?
 O9 Eu1 O5 N3 122.4(8) . . . . ?
 O9 Eu1 O1 N1 -144.6(6) . . . . ?
 O9 Eu1 O14 C42 157.2(7) . . . . ?
 O9 C30 C31 C32 -1.5(13) . . . . ?
 O11 Eu1 O10 C32 174.3(7) . . . . ?
 O11 Eu1 O9 C30 -13.1(8) . . . . ?
 O11 Eu1 O13 C40 129.0(7) . . . . ?
 O11 Eu1 O12 C37 -8.8(6) . . . . ?
 O11 Eu1 O5 N3 -88.3(7) . . . . ?
 O11 Eu1 O1 N1 63.1(6) . . . . ?
 O11 Eu1 O14 C42 -21.8(7) . . . . ?
 C19 N4 C21 N3 9.1(8) . . . . ?
 C19 N4 C21 C22 -171.6(7) . . . . ?
 F13 C39 C40 O13 -171.5(13) . . . . ?
 F13 C39 C40 C41 5.7(18) . . . . ?
 O13 Eu1 O10 C32 122.3(6) . . . . ?
 O13 Eu1 O9 C30 -138.9(6) . . . . ?
 O13 Eu1 O11 C35 -69.9(7) . . . . ?
 O13 Eu1 O12 C37 69.9(6) . . . . ?
 O13 Eu1 O5 N3 -12.3(9) . . . . ?
 O13 Eu1 O1 N1 -11.4(6) . . . . ?
 O13 Eu1 O14 C42 20.0(6) . . . . ?
 O13 C40 C41 C42 -1.8(15) . . . . ?
 O12 Eu1 O10 C32 -130.9(6) . . . . ?
 O12 Eu1 O9 C30 118.4(6) . . . . ?
 O12 Eu1 O11 C35 9.5(6) . . . . ?
 O12 Eu1 O13 C40 54.3(7) . . . . ?
 O12 Eu1 O5 N3 -20.4(7) . . . . ?
 O12 Eu1 O1 N1 10.1(8) . . . . ?
 O12 Eu1 O14 C42 -59.7(6) . . . . ?
 O5 Eu1 O10 C32 -80.7(6) . . . . ?
 O5 Eu1 O9 C30 68.3(6) . . . . ?
 O5 Eu1 O11 C35 78.4(7) . . . . ?
 O5 Eu1 O13 C40 46.2(9) . . . . ?
 O5 Eu1 O12 C37 -114.5(7) . . . . ?
 O5 Eu1 O1 N1 166.1(6) . . . . ?
 O5 Eu1 O14 C42 -130.6(6) . . . . ?
 O5 N3 C16 C19 167.6(6) . . . . ?
 O5 N3 C16 C15 47.4(8) . . . . ?
 O5 N3 C16 C17 -72.5(8) . . . . ?
 C21 N4 C19 C18 94.4(7) . . . . ?
 C21 N4 C19 C20 -143.9(7) . . . . ?
 C21 N4 C19 C16 -23.3(8) . . . . ?
 C21 N3 C16 C19 -25.0(8) . . . . ?
 C21 N3 C16 C15 -145.2(7) . . . . ?
 C21 N3 C16 C17 94.9(7) . . . . ?
 C21 C22 C23 C27 178.9(7) . . . . ?
 O1 Eu1 O10 C32 79.4(6) . . . . ?
 O1 Eu1 O9 C30 -78.7(6) . . . . ?
 O1 Eu1 O11 C35 -144.6(7) . . . . ?
 O1 Eu1 O13 C40 -137.1(7) . . . . ?
 O1 Eu1 O12 C37 48.3(8) . . . . ?
 O1 Eu1 O5 N3 172.4(6) . . . . ?
 O1 Eu1 O14 C42 87.5(7) . . . . ?
 O1 N1 C2 C3 -74.1(8) . . . . ?
 O1 N1 C2 C1 45.6(9) . . . . ?
 O1 N1 C2 C5 166.5(6) . . . . ?
 O1 N1 C7 N2 -179.6(6) . . . . ?
 O1 N1 C7 C8 -0.2(12) . . . . ?
 O14 Eu1 O10 C32 -12.5(8) . . . . ?
 O14 Eu1 O9 C30 168.4(6) . . . . ?
 O14 Eu1 O11 C35 -28.9(8) . . . . ?
 O14 Eu1 O13 C40 -22.8(7) . . . . ?
 O14 Eu1 O12 C37 144.9(7) . . . . ?
 O14 Eu1 O5 N3 50.8(7) . . . . ?
 O14 Eu1 O1 N1 -76.7(6) . . . . ?
 C4 C5 C2 C3 158.2(8) . . . . ?
 C4 C5 C2 N1 -88.5(8) . . . . ?
 C4 C5 C2 C1 30.3(10) . . . . ?
 C20 C19 C16 N3 143.8(7) . . . . ?
 C20 C19 C16 C15 -98.6(8) . . . . ?
 C20 C19 C16 C17 30.3(10) . . . . ?
 N2 C5 C2 C3 -89.5(8) . . . . ?
 N2 C5 C2 N1 23.7(7) . . . . ?
 N2 C5 C2 C1 142.6(7) . . . . ?
 N3 C21 C22 C24 33.1(11) . . . . ?
 N3 C21 C22 C23 -145.5(8) . . . . ?
 C9 C8 C7 N2 38.0(11) . . . . ?
 C9 C8 C7 N1 -141.3(7) . . . . ?
 C9 C8 C11 C12 -4.7(13) . . . . ?
 C9 C10 C13 O3 178.5(7) . . . . ?
 C9 C10 C13 C12 -1.0(13) . . . . ?
 C6 C5 C2 C3 26.2(11) . . . . ?
 C6 C5 C2 N1 139.5(8) . . . . ?
 C6 C5 C2 C1 -101.7(9) . . . . ?
 C8 C9 C10 O4 178.5(7) . . . . ?
 C8 C9 C10 C13 0.9(11) . . . . ?
 C24 C25 C26 O8 179.9(7) . . . . ?
 C24 C25 C26 C27 0.2(12) . . . . ?
 C24 C22 C23 C27 0.2(11) . . . . ?
 C22 C21 N3 O5 -2.0(12) . . . . ?
 C22 C21 N3 C16 -168.3(7) . . . . ?
 C5 N2 C7 N1 7.5(9) . . . . ?
 C5 N2 C7 C8 -171.9(7) . . . . ?
 C2 N1 C7 N2 11.0(9) . . . . ?
 C2 N1 C7 C8 -169.6(7) . . . . ?
 C14 O4 C10 C9 174.5(9) . . . . ?
 C14 O4 C10 C13 -7.7(10) . . . . ?
 C14 O3 C13 C12 -173.6(10) . . . . ?
 C14 O3 C13 C10 6.9(10) . . . . ?
 C27 O7 C28 O8 9.9(9) . . . . ?
 C27 C26 O8 C28 6.1(9) . . . . ?
 C37 C36 C35 O11 0.0(13) . . . . ?
 C37 C36 C35 C34 -178.0(7) . . . . ?
 C39 C40 C41 C42 -178.6(9) . . . . ?
 C7 N2 C5 C4 97.6(8) . . . . ?
 C7 N2 C5 C6 -140.4(8) . . . . ?
 C7 N2 C5 C2 -20.7(8) . . . . ?
 C7 N1 C2 C3 96.1(8) . . . . ?
 C7 N1 C2 C1 -144.2(7) . . . . ?
 C7 N1 C2 C5 -23.3(8) . . . . ?
 C7 C8 C11 C12 175.9(8) . . . . ?
 C11 C8 C7 N2 -142.5(8) . . . . ?
 C11 C8 C7 N1 38.2(11) . . . . ?
 C11 C12 C13 O3 178.9(9) . . . . ?
 C11 C12 C13 C10 -1.7(14) . . . . ?
 C10 O4 C14 O3 12.3(11) . . . . ?
 C10 C9 C8 C7 -178.7(7) . . . . ?
 C10 C9 C8 C11 1.9(11) . . . . ?
 C33 C32 C31 C30 173.8(7) . . . . ?
 C13 O3 C14 O4 -12.0(11) . . . . ?
 C13 C12 C11 C8 4.5(14) . . . . ?
 C29 C30 C31 C32 178.4(7) . . . . ?
 C40 C41 C42 O14 -1.4(15) . . . . ?
 C40 C41 C42 C43 177.7(8) . . . . ?
 C28 O7 C27 C26 -6.3(9) . . . . ?
 C28 O7 C27 C23 174.1(8) . . . . ?
 C35 C36 C37 O12 0.4(13) . . . . ?
 C35 C36 C37 C38 179.1(8) . . . . ?
 C31 C32 C33 F4 -11.7(10) . . . . ?
 C31 C32 C33 F5 -132.4(8) . . . . ?
 C31 C32 C33 F6 109.3(8) . . . . ?

_olex2_submission_special_instructions 'No special instructions were received'
_oxdiff_exptl_absorpt_empirical_details
;
Empirical correction (ABSPACK) includes:
- Absorption correction using spherical harmonics
- Frame scaling
;
_oxdiff_exptl_absorpt_empirical_full_max 1.581
_oxdiff_exptl_absorpt_empirical_full_min 0.701
