# Supplementary material
Source: publisher figshare collection journal article supplement (https://tandf.figshare.com/articles/dataset/_/7828961)
Supplement: Supplementary file 2 [file 1 › supporting imformation.docx]

**Supporting Information**

**A Novel Rare-Earth Nitronyl Nitroxide Radical Complex** **as a High-Efficiency Sensor for Cr3+ and Cr2O72- Ions in Aqueous Solutions**

Yue-Ying Yuan a,Yu-Jun Sun, Peng-Jing Liu, Chen-Xi Zhang*a,b and Qing-Lun Wangc,d

*aCollege of Chemical Engineering and Materials Science, Tianjin University of Science and Technology, Tianjin 300457, P. R. China*

*bTianjin Key Laboratory of Marine Resources and Chemistry, Tianjin 300457, P. R. China*

*cKey Laboratory of Advanced Energy Materials Chemistry (Ministry of Education), Nankai University, Tianjin 300071, P. R. China*

*dCollege of Chemistry, Nankai University, Tianjin 300071, P. R. China*

*Corresponding author. Email: [zcx@tust.edu.cn](mailto:zcx@tust.edu.cn)

**Table S1.** Selected bond lengths (Å) and angles(°)forcomplex **1**

| **Bond lengths(Å)** |  |  |  |
| --- | --- | --- | --- |
| Eu(1)-O(10) | 2.389(5) | Eu(1)-O(1) | 2.352(5) |
| Eu(1)-O(9) | 2.394(5) | Eu(1)-O(14) | 2.387(5) |
| Eu(1)-O(11) | 2.372(5) | O(2)-N(2) | 1.264(8) |
| Eu(1)-O(13) | 2.434(5) | O(5)-N(3 | 1.304(7) |
| Eu(1)-O(12) | 2.416(5) | N(4)-O(6) | 1.264(8) |
| Eu(1)-O(5) | 2.344(5) | O(1)-N(1) | 1.321(7) |
| **Bond angles (°)** |  |  |  |
| O(10)-Eu(1)-O(9) | 73.33(17) | O(5)-Eu(1)-O(12) | 73.25(17) |
| O(10)-Eu1-O(13) | 134.64(18) | O(5)-Eu(1)-O(1) | 136.18(17) |
| O(10)-Eu(1)-O(12) | 126.22(17) | O(5)-Eu(1)-O(14) | 94.97(18) |
| O(9)-Eu(1)-O(13) | 125.66(17) | O(5)-Eu(1)-O(10) | 70.35(16) |
| O(9)-Eu(1)-O(12) | 131.15(17) | O(5)-Eu(1)-O(9) | 76.37(17) |
| O(11)-Eu(1)-O(10) | 76.23(17) | O(1)-Eu(1)-O(11) | 89.87(18) |
| O(11)-Eu(1)-O(9) | 149.30(17) | O(1)-Eu(1)-O(13) | 75.25(17) |
| O(11)-Eu(1)-O(13) | 75.02(18) | O(1)-Eu(1)-O(12) | 148.70(18) |
| O(11)-Eu(1)-O(12) | 71.88(17) | O(1)-Eu(1)-O(14) | 107.36(18) |
| O(11)-Eu(1)-O(14) | 136.89(17) | O(14)-Eu(1)-O(10) | 146.57(18) |
| O(12)-Eu(1)-O(13) | 75.55(18) | O(14)-Eu(1)-O(9) | 73.80(17) |
| O(5)-Eu(1)-O(10) | 70.40(17) | O(14)-Eu(1)-O(13) | 71.96(18) |
| O(5)-Eu(1)-O(9) | 74.43(17) | O(14)-Eu(1)-O(12) | 73.62(17) |
| O(5)-Eu(1)-O(11) | 99.04(18) | N(1)-O(1)-Eu(1) | 138.1(4) |
| O(5)-Eu(1)-O(13) | 148.50(18) | N(3)-O(5)-Eu(1) | 143.4(4) |


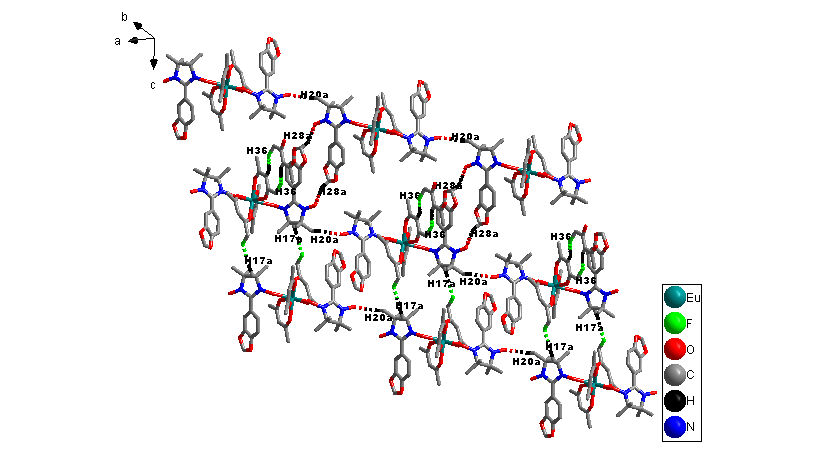


**Fig. S1.** The van der Waals interaction in complex**1**

**
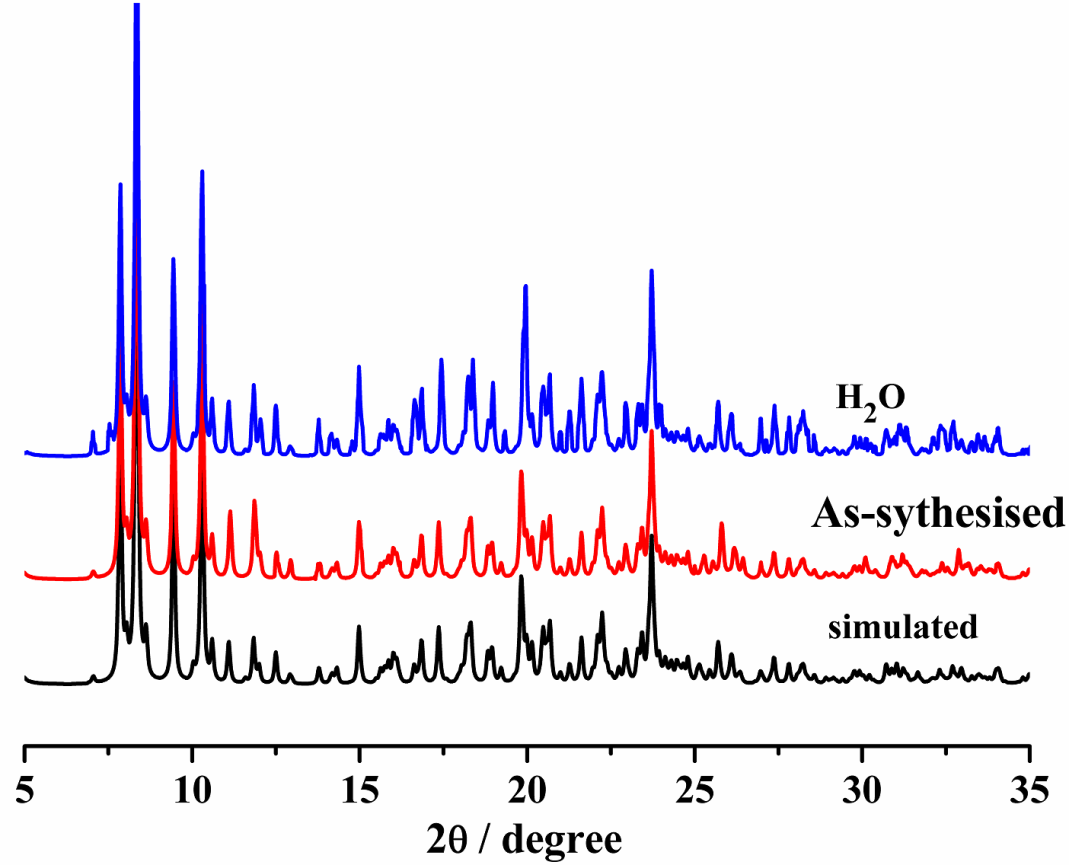
**

**Fig. S2.** PXRD of complex **1**. Calculated pattern from single-crystal X-ray data (black); experimental data (red); after soaked in aqueous solution (blue).

**
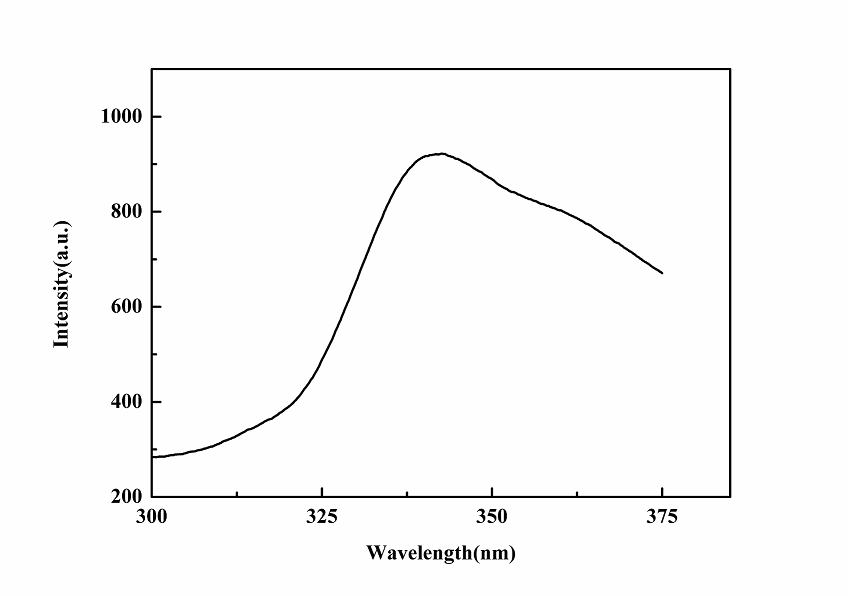
**

**Fig. S3.** Excitation spectra of complex**1** in aqueous solution.


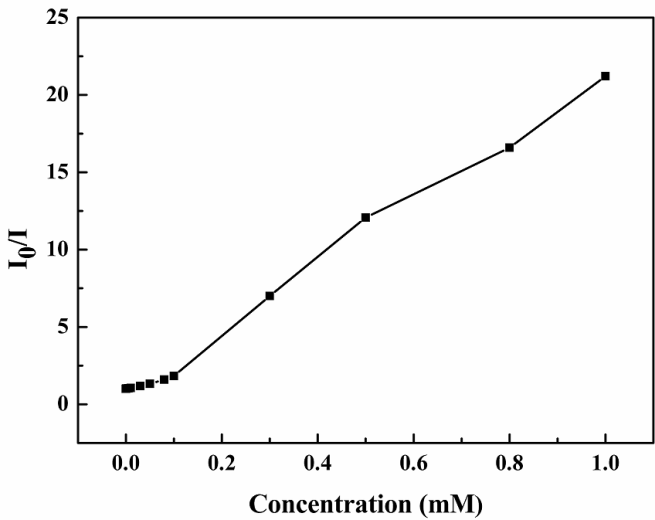


**Fig. S4.** The *I0/I* versus the concentration of Cr3+ ion for complex **1** (from 0 to 1 mM)

**
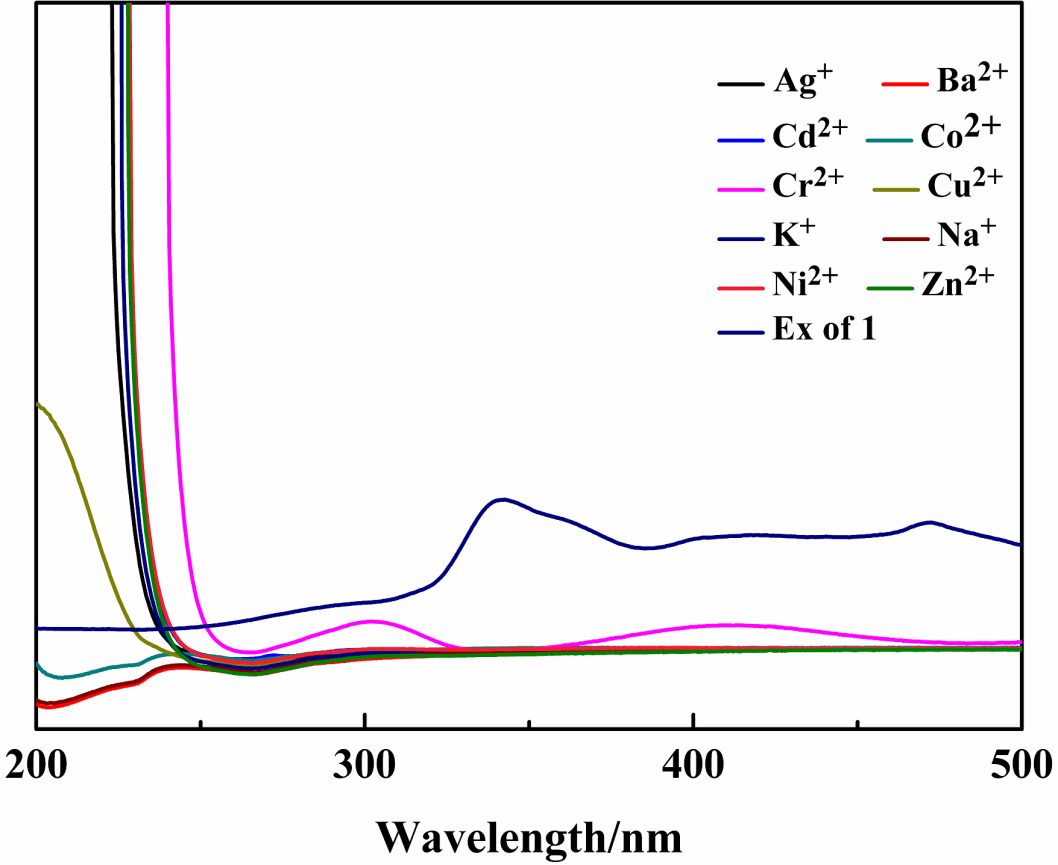
**

Fig.S5. UV-vis spectra of different metal ions and excitation spectra ofcomplex1 in aqueous solutions.

**
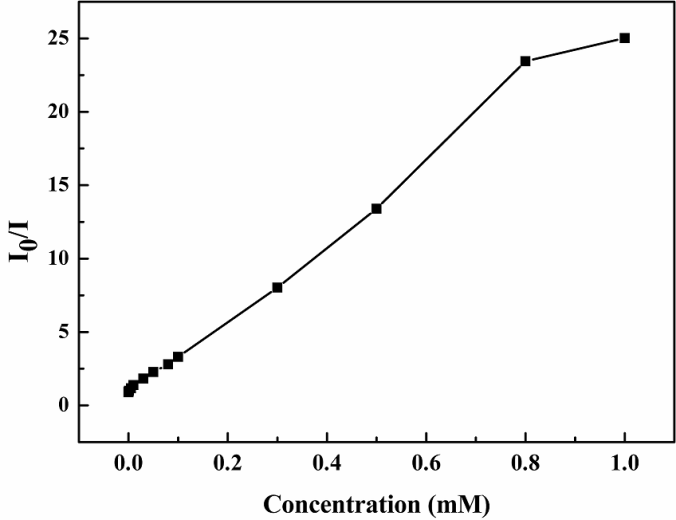
**

**Fig.S6.**The *I0/I* versus the concentration of Cr2O72- ion for complex**1** (from 0 to 1 mM).

.


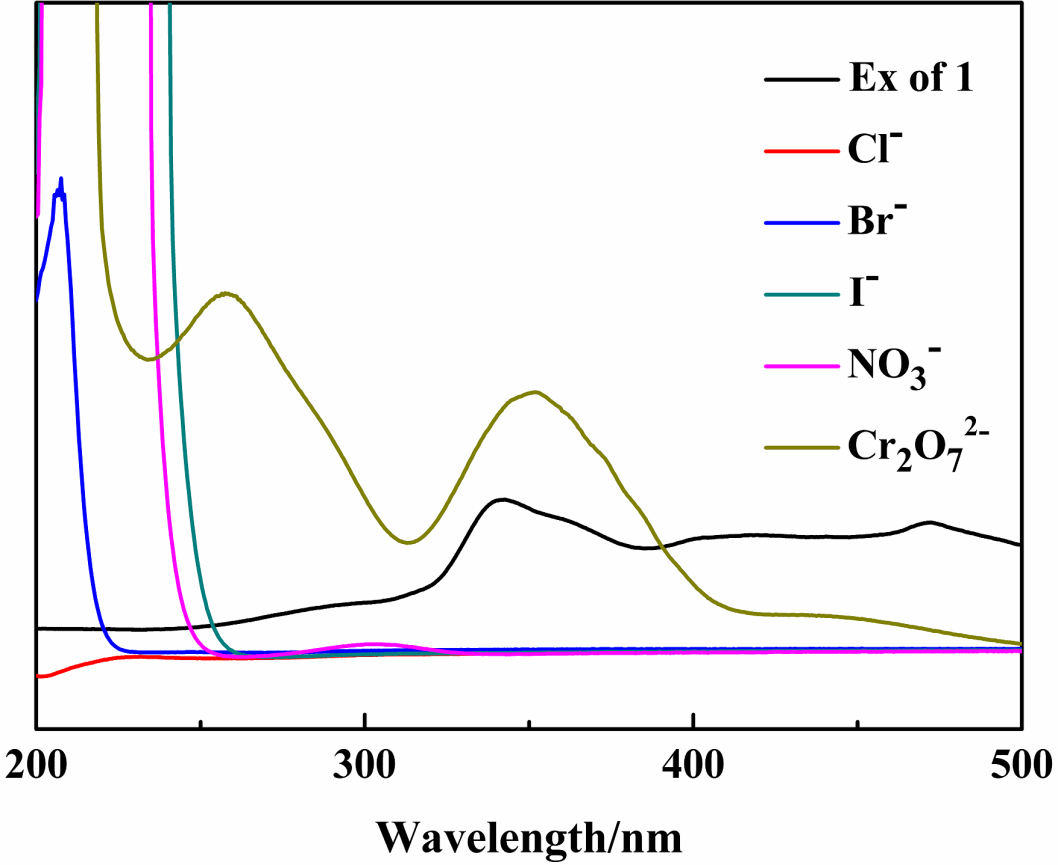


**Fig. S7.** UV-vis spectra of different anions and excitation spectra of complex**1** in aqueous solutions.
